# Supplementary material
Source: Springer Nature journal article supplement (https://www.springermedizin.de/resource/supplementary/12958_2007_421_MOESM4_ESM.pdf/9567842)

EMP2

$\gamma$ -adaptin

Colocalization

VC

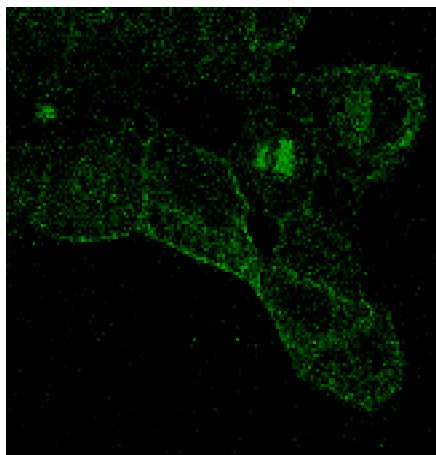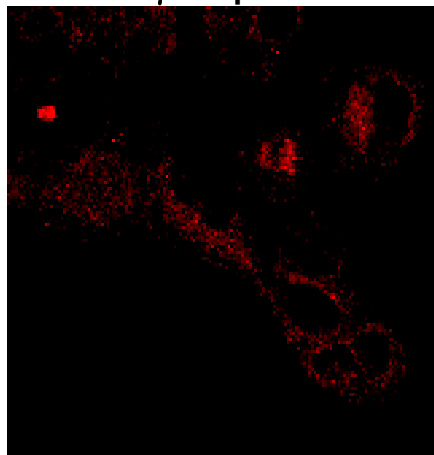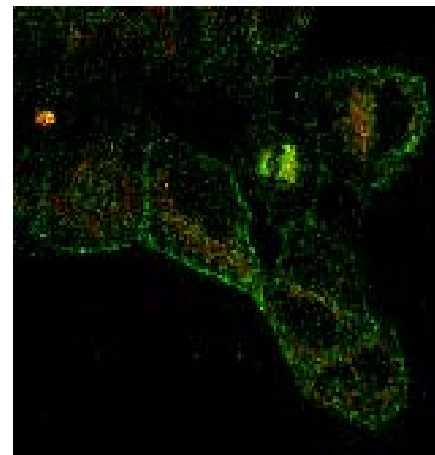

+ E2

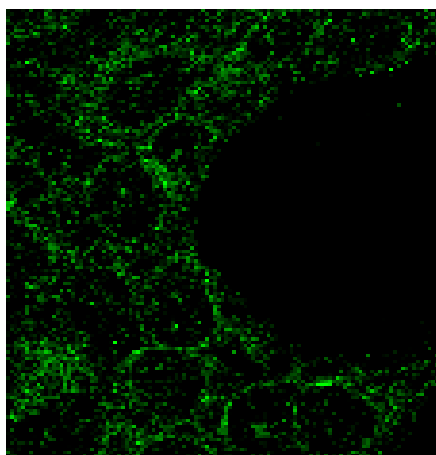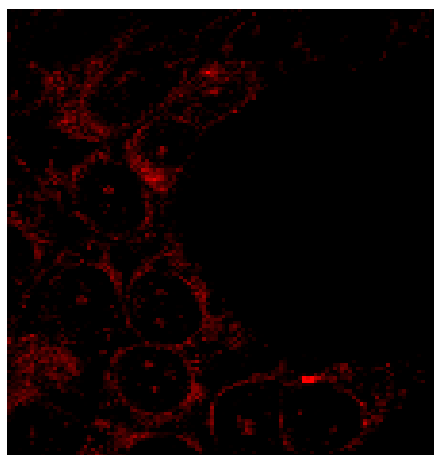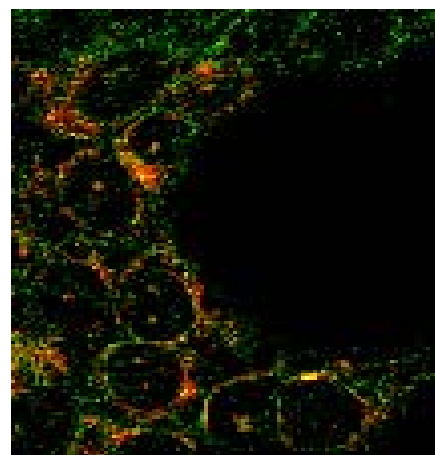

+ P4

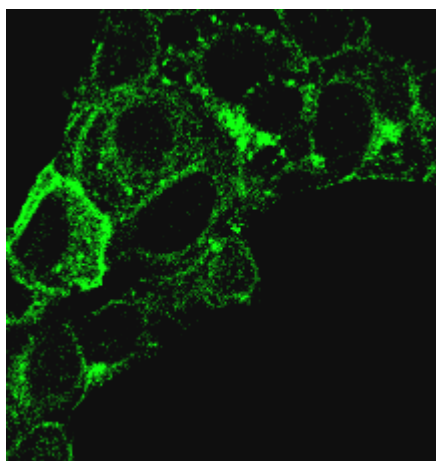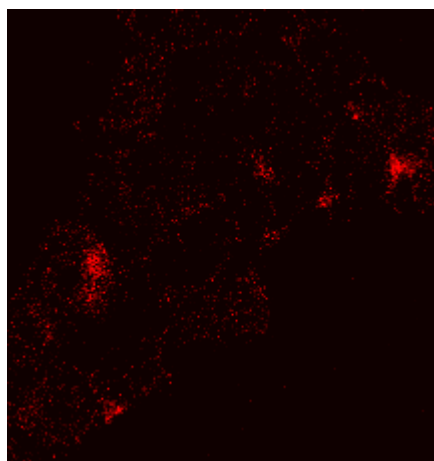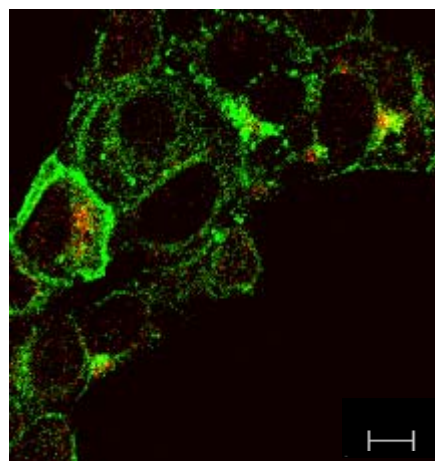

Supplement: MOESM4 [file 9567842]
